# Supplementary material
Source: PubMed Central journal article supplement (PMC8410802)
Supplement: 41422_2021_524_MOESM3_ESM.pdf [file 41422_2021_524_MOESM3_ESM.pdf]

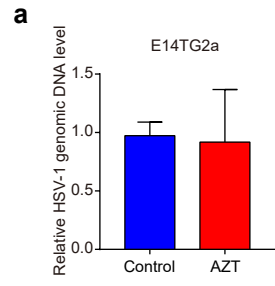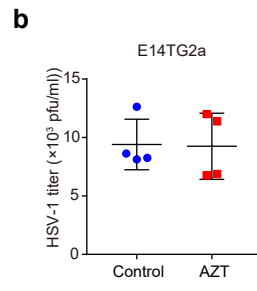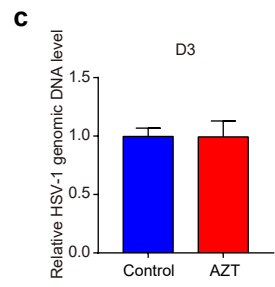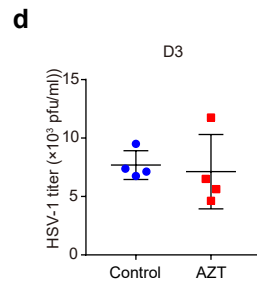

**Fig. S3: The endogenous RTase-mediated antiviral mechanism could not restrict DNA virus infection in mESCs.**

**a** and **b**, Effects of AZT on HSV-1 replication in E14TG2a cells. The E14TG2a cells were pre-treated with 100  $\mu$ M AZT for 6h and then were infected with HSV-1 (moi = 0.1) for 24 h. The genomic DNA level of HSV-1 was determined by qPCR with Tert as an internal control (**a**) and HSV-1 viral titers were valued by plaque assay (**b**). **c** and **d**, Effects of AZT on HSV-1 replication in D3 cells. The graphs represent means  $\pm$  SD from three (**a**, **c**) or four (**b**, **d**) independent replicates measured in triplicate.
