# Supplementary material
Source: PubMed Central journal article supplement (PMC8410802)
Supplement: 41422_2021_524_MOESM5_ESM.pdf [file 41422_2021_524_MOESM5_ESM.pdf]

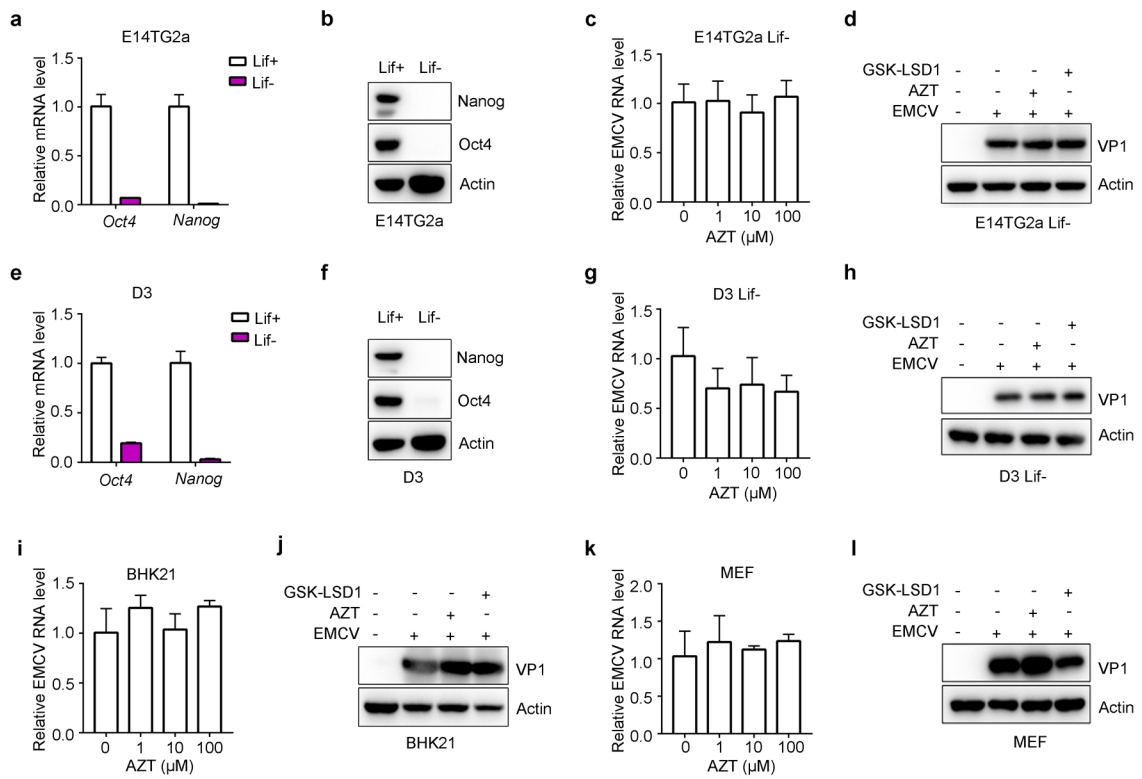

**Fig. S5: The endogenous RTase has minimal effects on virus infection in differentiated cells and somatic cells.**

**a-d**, Effects of AZT and GSK-LSD1 on virus infection in differentiated E14TG2a cells. E14TG2a cells were induced to differentiate in the medium without Lif for 7 days. Expression of stem cell markers, Oct4 and Nanog, were validated by qRT-PCR (**a**) and immunoblotting (**b**). Differentiated E14TG2a cells were infected with EMCV (moi = 1) after treatment with AZT at the indicated concentrations for 6 h. The RNA level of EMCV was determined by qRT-PCR (**c**). Differentiated E14TG2a cells were pre-treated with 100  $\mu$ M AZT or 50  $\mu$ M GSK-LSD1 and infected with EMCV. The protein level of EMCV VP1 was analyzed by immunoblotting (**d**). **e-h**, Effects of AZT and GSK-LSD1 on virus infection in differentiated D3 cells. D3 cells were differentiated, treated with drugs, infected with virus and analyzed by the same as in **a-d**. **i-l**, Effects of AZT and GSK-LSD1 on virus infection in somatic cells. BHK21 and MEF cells were treated with drugs, infected with virus and analyzed by the same as above. Data in **b, d, f, h, j, l** are representative of three independent experiments. In **a, c, e, g, i, k**, the graphs represent means  $\pm$  SD from three independent replicates measured in triplicate.
