# Supplementary material
Source: PubMed Central journal article supplement (PMC8410802)
Supplement: 41422_2021_524_MOESM6_ESM.pdf [file 41422_2021_524_MOESM6_ESM.pdf]

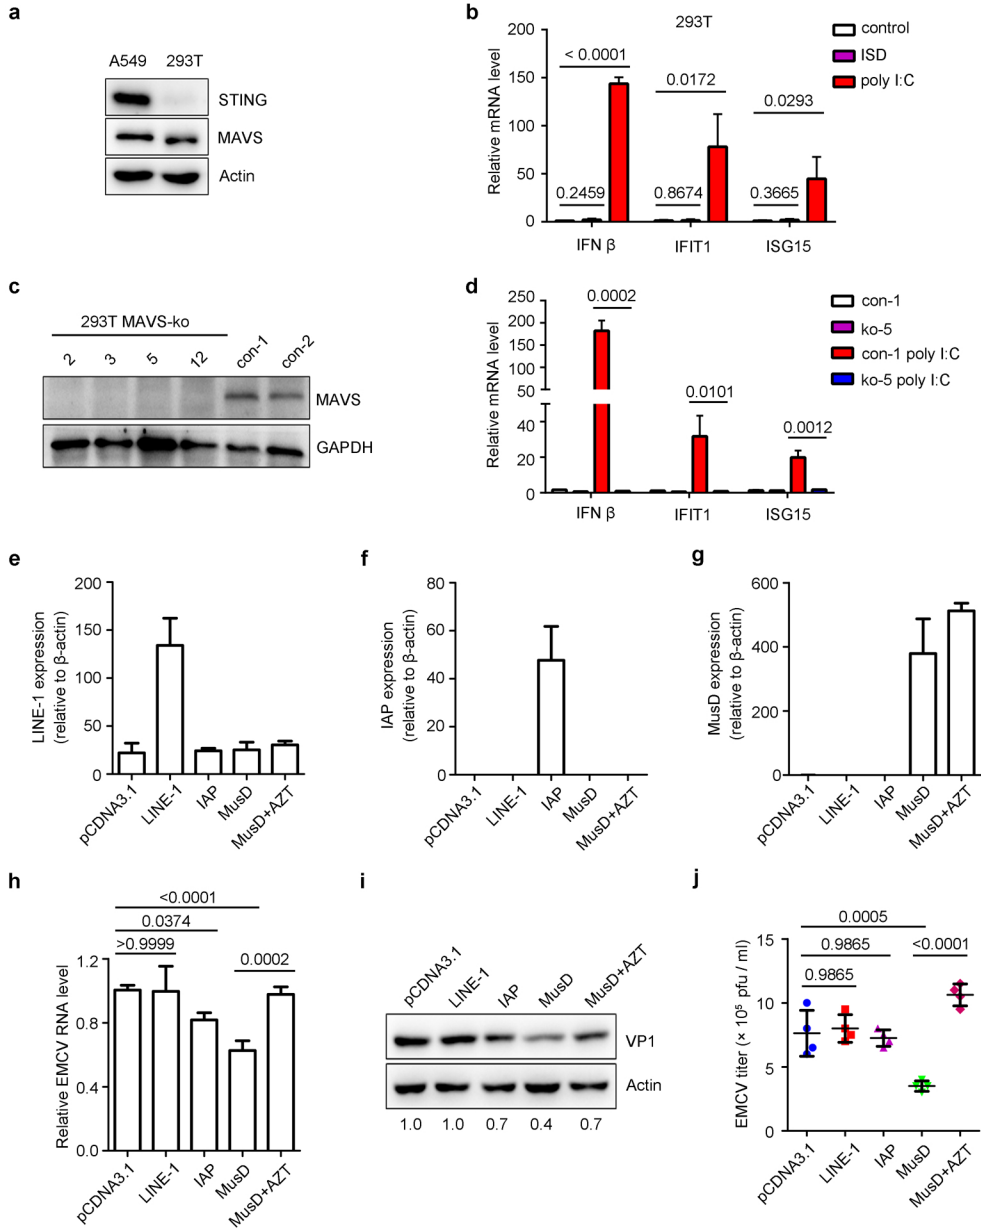

**Fig. S6: The intact endogenous retrovirus inhibits virus infection in IFN pathway-deficient somatic cells.**

**a, b**, 293T cells were deficient in DNA sensing. The protein levels of STING and MAVS in 293T and A549 cells were analyzed by immunoblotting (**a**). The mRNA levels of IFN $\beta$ , IFIT1 and ISG15 were tested by qRT-PCR in 293T cells after ISD (IFN-stimulatory DNA) or poly I:C dsRNA transfection for 12 h (**b**). **c**, Generation of MAVS knockout cell lines by CRISPR/Cas9. Single clones of MAVS-KO 293T cells were picked and validated by immunoblotting. **d**, MAVS-KO-5 293T cells were deficient in RNA sensing. Cells were transfected with poly I: C dsRNA for 12 h and the mRNA levels of IFN $\beta$ , IFIT1 and ISG15 were analyzed by qRT-PCR. **e-j**, MAVS-ko-5 cells were transfected with plasmids containing LINE-1, IAP or MusD for 36 h before infected with EMCV (moi = 1) for 24 h. For one of the MusD overexpression group, cells were pretreated with 100  $\mu$ M AZT for 6h before virus infection. The expression level of LINE-1 (**e**), IAP (**f**) and MusD (**g**) were evaluated by qRT-PCR with specific primers. The RNA level of EMCV (**h**) were measured by qRT-PCR and the protein level of VP1 was analyzed by immunoblotting (**i**). The viral titer was examined by plaque assay (**j**). Data in **a, c, i** are representative of three independent experiments. The graphs represent means  $\pm$  SD from three (**b, d**) or four (**e-h, j**) independent replicates measured in triplicate. Statistics were calculated by the two-tailed unpaired Student's *t*-test (**b, d**) or one-way ANOVA with Tukey's post hoc tests (**h, j**).
