# Supplementary material
Source: PubMed Central journal article supplement (PMC8410802)
Supplement: 41422_2021_524_MOESM7_ESM.pdf [file 41422_2021_524_MOESM7_ESM.pdf]

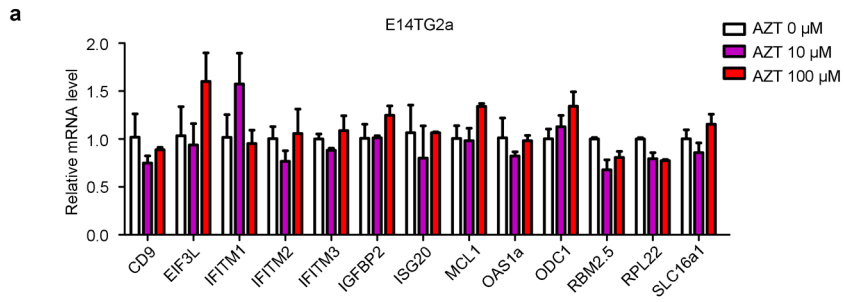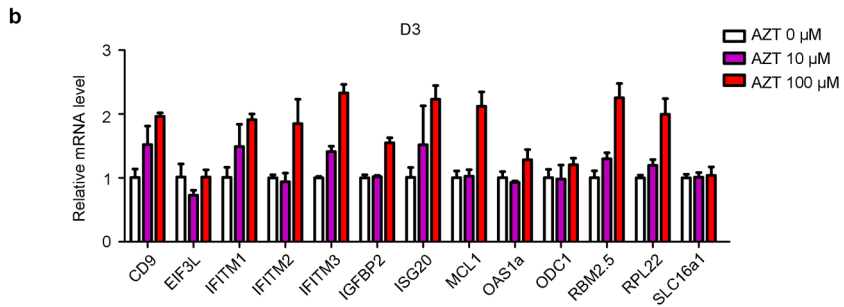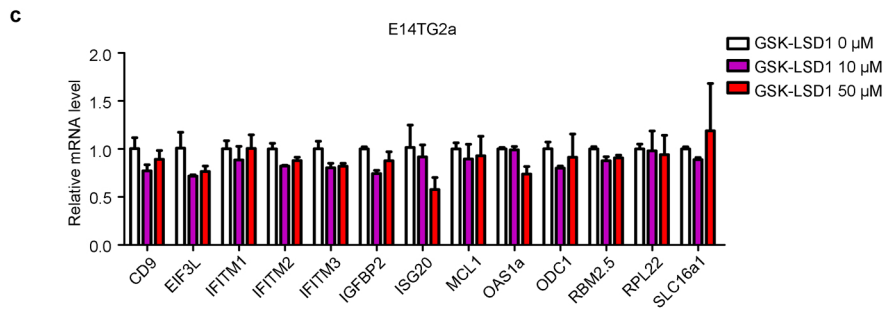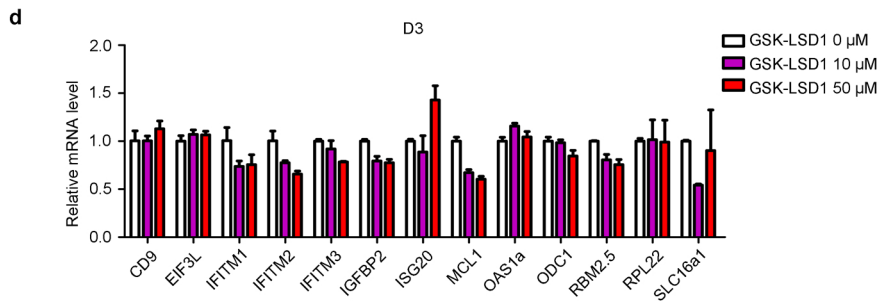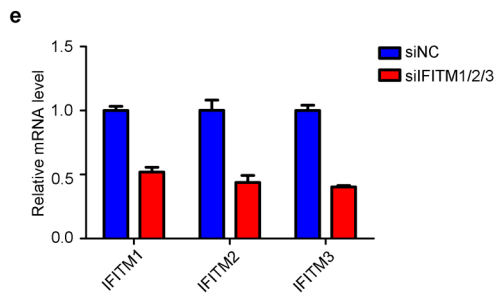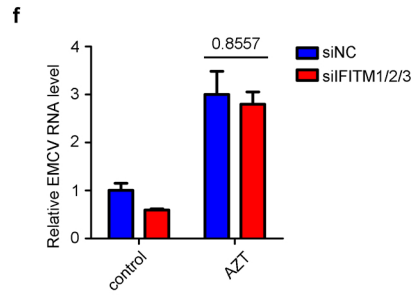

**Fig. S7: The antiviral function of the endogenous RTase is not through regulating the expression of the intrinsically expressed ISGs.**

**a, b**, The influence of AZT on the expression of ISGs. E14TG2a (**a**) and D3 (**b**) cells were treated with AZT at the indicated concentrations for 24 h. The mRNA levels of the intrinsically expressed ISGs were analyzed by qRT-PCR. **c, d**, The influence of GSK-LSD1 on the expression of ISGs. E14TG2a (**c**) and D3 (**d**) cells were treated with GSK-LSD1 at the indicated concentrations for 24 h. The mRNA levels of the intrinsically expressed ISGs were analyzed by qRT-PCR. **e, f**, Depletion of IFITMs has minimal effects on AZT's function. E14TG2a cells were transfected with siRNAs targeting IFITM1/2/3. Twenty-four hours after transfection, cells were treated with 100  $\mu$ M AZT for 6 h and then infected with EMCV for another 24 h. The knockdown efficiency (**e**) and the viral RNA level (**f**) were analyzed by qRT-PCR. In **a-f**, the graphs represent means  $\pm$  SD from three independent replicates measured in triplicate. *P* value was determined by the two-tailed unpaired Student's *t*-test (**f**).
