# Supplementary material
Source: PubMed Central journal article supplement (PMC8410802)
Supplement: 41422_2021_524_MOESM8_ESM.pdf [file 41422_2021_524_MOESM8_ESM.pdf]

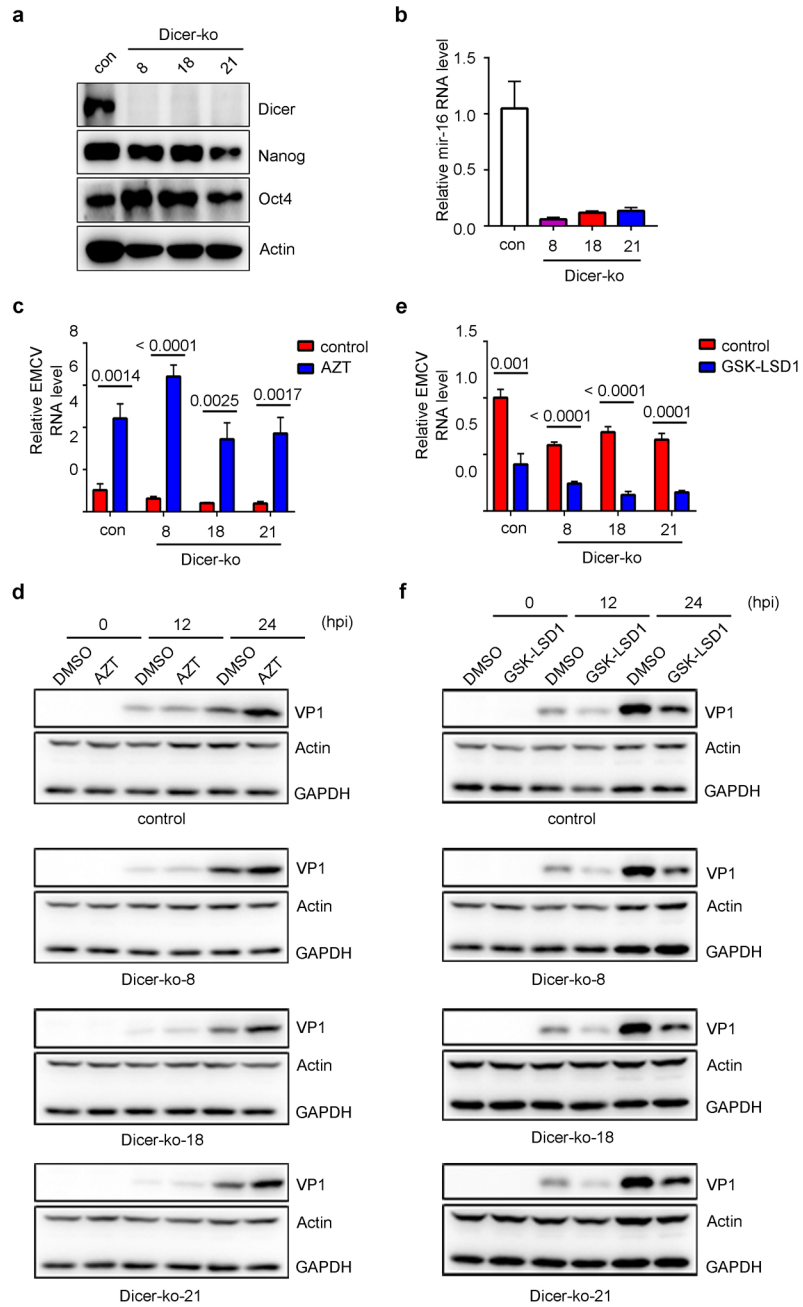

**Fig. S8: The virus restriction role of the endogenous RTase in mESCs is independent of RNAi pathway.**

**a**, Generation of Dicer knock-out E14TG2a cell lines by CRISPR/Cas9 technology. **b**, The successful blockage of dicer activity in the knock-out cell lines. The miRNA-16 expression level was detected by qPCR in the indicated cell lines. **c, d**, The control and Dicer knock-out cells were pre-treated with 100  $\mu$ M AZT and infected with EMCV (moi=1) for 24 h. The RNA level of EMCV was determined by qRT-PCR (**c**) and the protein level of EMCV VP1 was analyzed by immunoblotting (**d**). Actin and GAPDH were used as loading control. **e, f**, The control and Dicer knock-out cells were pre-treated with 50  $\mu$ M GSK-LSD1 and infected with EMCV (moi=1) for 24 h. The RNA level of EMCV was determined by qRT-PCR (**e**) and the protein level of EMCV VP1 was analyzed by immunoblotting (**f**). In **b, c, e**, the graphs represent means  $\pm$  SD from three independent replicates measured in triplicate. Data in **d, f** are representative of three independent experiments.
