# Supplementary material
Source: PubMed Central journal article supplement (PMC8410802)
Supplement: 41422_2021_524_MOESM10_ESM.pdf [file 41422_2021_524_MOESM10_ESM.pdf]

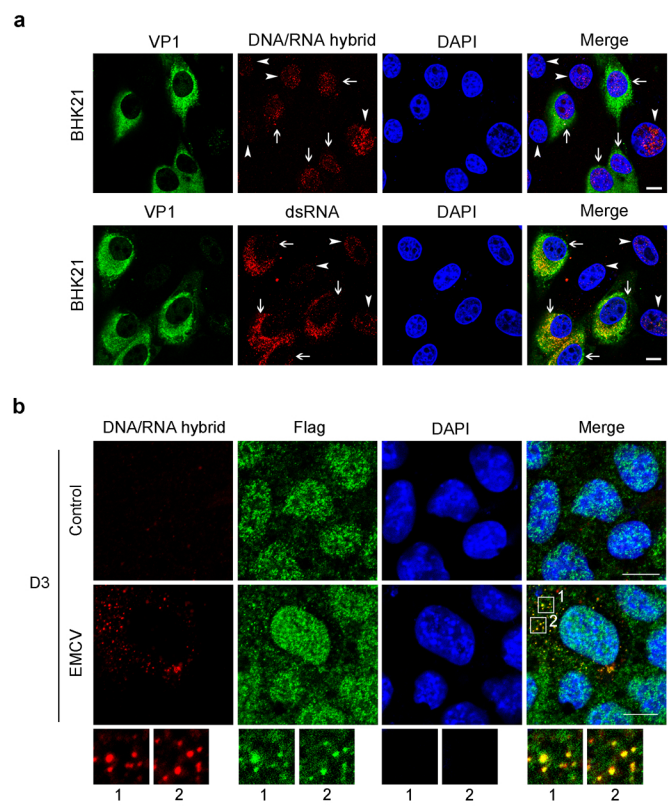

**Fig. S10: DNA/RNA hybrids induced by virus infection can be recognized by the enzymatically inactive RNase H1 in mESCs.**

**a**, The S9.6 antibody specifically recognizes DNA/RNA hybrids. BHK21 cells infected by EMCV for 6 h were fixed and stained with S9.6 antibody (upper panel) or J2 dsRNA specific antibody (lower panel), and were co-stained with VP1 (green). Nuclei were stained with DAPI (blue). Arrows indicate infected cells. Arrowheads point to the uninfected cells. Scale bar, 10  $\mu\text{m}$ . **b**, The Flag-tagged catalytically inactive mutant (E186Q) of mouse RNase H1 were transfected into D3 cells with lentivirus infection and then were infected with EMCV (moi=1) for 24h. The colocalization of DNA/RNA hybrids (S9.6 antibody, red) with the inactive RNase H1 mutant (anti-Flag, green) in EMCV-infected cells was visualized by immunofluorescent staining. Nuclei were stained with DAPI (blue). Scale bar, 10  $\mu\text{m}$ . Data in **a,b** are representative of three independent experiments.
