# Supplementary material
Source: PubMed Central journal article supplement (PMC8410802)
Supplement: 41422_2021_524_MOESM12_ESM.pdf [file 41422_2021_524_MOESM12_ESM.pdf]

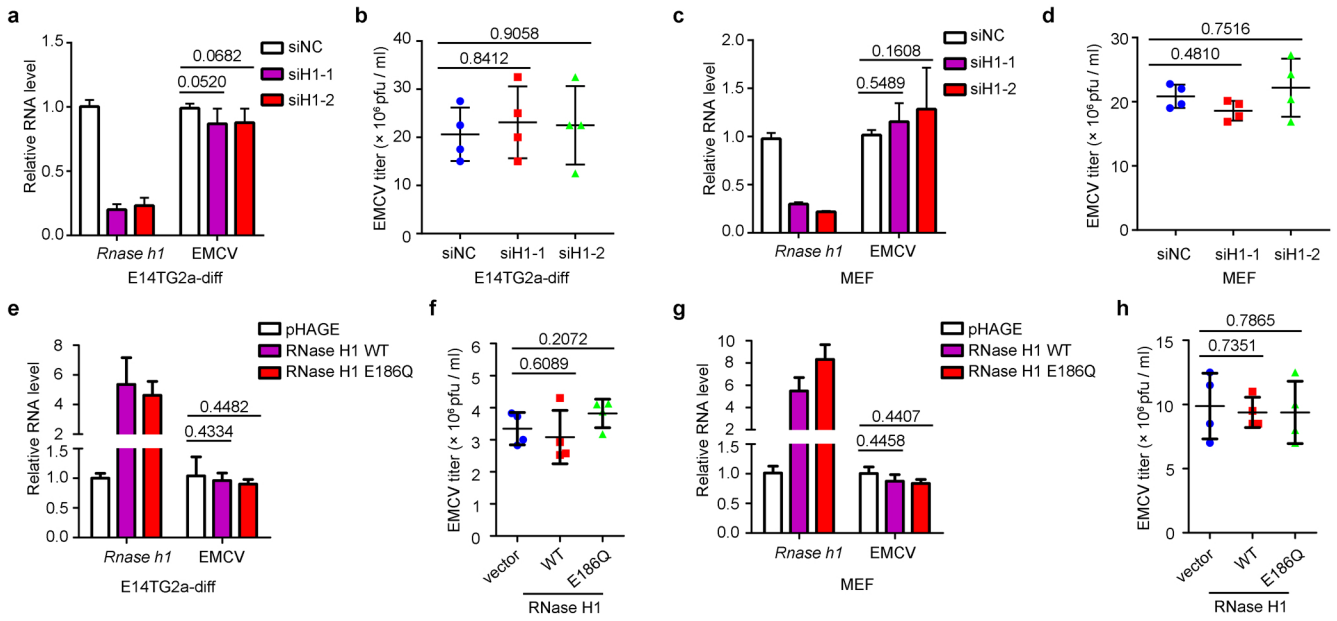

**Fig. S12: RNase H1 could not restrict virus infection in differentiated mESCs and somatic cells.**

**a-d**, The differentiated E14TG2a (**a, b**) and MEF cells (**c, d**) were infected with EMCV (moi = 1) after transfection with siRNAs for 36 h. The RNA level of RNaseH1 and EMCV was determined by qRT-PCR (**a, c**) and EMCV viral titers were valued by plaque assay (**b, d**). **e-h**, The wild-type and an enzymatically inactive mutant (E186Q) of mouse RNase H1 were transfected into the differentiated E14TG2a (**e, f**) and MEF cells (**g, h**) followed by EMCV infection. The levels of viral RNA (**e, g**) and the viral titers (**f, h**) were analyzed. The graphs represent means  $\pm$  SD from three (**a, c**) or four (**b, d-h**) independent replicates measured in triplicate. Statistics were calculated by the two-tailed unpaired Student's t-test.
