# Supplementary material
Source: PubMed Central journal article supplement (PMC8410802)
Supplement: 41422_2021_524_MOESM13_ESM.pdf [file 41422_2021_524_MOESM13_ESM.pdf]

**Supplementary information, Table S1. PCR primers used in this work**

| Target name    | Forward primer            | Reverse primer              |
|----------------|---------------------------|-----------------------------|
| EMCV p1        | GAGATCCGGATTGCCAGTCT      | GCCCTCACATTGCCAAAAGA        |
| EMCV p2        | CACTGGTACACCAACCAAGC      | GCAAAGAACAGAGTGCCGAA        |
| EMCV p3        | ATGGAATGGCCGCCTATGTA      | ATTGCCGACCGAAAATGGTC        |
| EMCV p4        | TGTCATGAACAGAGAGGCGT      | TCGAATGATGGCACGACAAC        |
| EMCV p5        | CAGGAGCAGGGACCTTACAA      | TGTGGCTCAAAGGCATTAC         |
| EMCV p6        | CGCCAAGACACGGATTGTAG      | TCGAATGATGGCACGACAAC        |
| MS2 RNA        | TCCTGCTCAACTTCCTGTCTGAG   | CATAGGTCAAACCTCCTAGGAATG    |
| mGapdh         | CATGGCCTTCCGTGTTCTTA      | CCTGCTTACCACCTTCTTGAT       |
| mTert          | CTAGCTCATGTGTCAAGACCCTCTT | ACGCACGCTACTAGTGAAGG        |
| mNanog         | ACCTGAGCTATAAGCAGGTTAAGA  | GTGCTGAGCCCTTCTGAATCAGAC    |
| mOct4          | CACGAGTGGAAAGCAACTCA      | AGATGGTGGTCTGGCTGAAC        |
| mIFN $\beta$   | CCGAGCAGAGATCTTCAGGAA     | CCTGCAACCACCACTCATTCT       |
| mISG15         | CCTCTGAGCATCCTGGTGAG      | ACTGGTCTTCGTGGACTTGTT       |
| mIFITM1        | GACAGCCACCACAATCAACAT     | CCCAGGCAGCAGAAGTTCAT        |
| mIFITM2        | TGGGCTTCGTTGCCTATGC       | AGAATGGGGTGTCTTTGTGC        |
| mIFITM3        | CCCCAAACTACGAAAGAATCA     | ACCATCTCCGATCCCTAGAC        |
| mCD9           | ATGCCGGTCAAAGGAGGTAG      | GCCATAGTCCAATAGCAAGCA       |
| mEIF3L         | TCTTACCCCGCTGATGACTAC     | CGCTCATAGGCAAGGTCTT         |
| mIGFBP2        | TGGAACATCTCTACTCCCTGC     | CTTCCCGGTATTGGGGTTCA        |
| mISG20         | CCTGAAGGAGGATATGAGCAAGT   | CCCGCCAGTTGTTCTGGAT         |
| mMCL1          | CAAAGATGGCGTAACAAACTGG    | CCGTTTCGTCTTACAAGAACA       |
| mOAS1a         | GCCTGATCCCAGAATCTATGC     | GAGCAACTCTAGGGCGTACTG       |
| mODC1          | GACGAGTTTACTGCCACATC      | CGCAACATAGAACGCATCCTT       |
| mRBM25         | ATGGTTGGAAAGCATTGGGA      | AAGCATGTCTGAAGCCTTCTC       |
| mRPL22         | AGCAGGTTTGAAGTTCACCC      | CAGCTTCCCATTCACCTTGA        |
| mSLC16A1       | TGTTAGTCGGAGCCTTCATTTT    | CACTGGTCGTTGCACTGAATA       |
| mRNaseH1       | TGGTTCAAAAGGGCAGGAAAG     | AAATGCGTCCTTGCTCACTAC       |
| MuERV1         | TTTCTCAAGGCCACCAATAGT     | GACACCTTTTTTAATATGCGAGCT    |
| MLV            | CGAGATCATGGGACAGACCGTAAC  | CTCCCAGGTGACGATATATGGGAC    |
| MTA            | ATGTCTTGGGAGGACTGTGGAAG   | AGCCCCAGCTAACCAGAACTACAG    |
| MusD           | GATTGGTGGAAGTTTAGCTAGCAT  | TAGCATTCTCATAAGCCAATTGCAT   |
| IAP            | CTTGCCCTTAAAGGTCTAAAAGCA  | GCGGTATAAGGTACAATTAAGATATGG |
| LINE-1         | TTTGGGACACAATGAAAGCA      | CTGCCGTCTACTCCTCTTGG        |
| SINE           | GAGCACCTGACTGCTCTTCC      | ACACACCAGAAGAGGGCATC        |
| miR-16         | GGCGGTAGCAGCACGTAAT       | GTGCAGGTCCGAGGT             |
| U6             | CTCGCTTCGGCAGCAC          | AACGCTTACGAATTTGCGT         |
| hActin         | AAGGAGCCCCACGAGAAAAAT     | ACCGAACTTGCATTGATTCCAG      |
| hIFN $\beta$   | CATTACCTGAAGGCCAAGGA      | CAATTGTCCAGTCCCAGAGG        |
| hISG15         | TCCTGGTGAGGAATAACAAGGG    | GTCAGCCAGAACAGGTGCTC        |
| hIFIT1         | TCAGGTCAAGGATAGTCTGGAG    | AGGTTGTGTATTCCCACACTGTA     |
| plasmid LINE-1 | TGAAAACCGGCACAAGACAG      | GCTGAGACGATGGGGTTTTC        |

---

|                               |                                  |                                                             |
|-------------------------------|----------------------------------|-------------------------------------------------------------|
| plasmid IAP                   | CCTTGACGTGGGAATCCTCT             | ATGGGGCGTTTCATTGGAC                                         |
| plasmid MusD                  | CGCCGAACTAACAGCAGTAC             | CCGGGCGAGAATGATGTTTT                                        |
| MHV-7                         | TATAAGAGTGATTGGCGTCC             | GAGTAATGGGGAACCACACT                                        |
| HSV-1                         | TGGGACACATGCCTTCTTGG             | ACCCTTAGTCAGACTCTGTTACTTACCC                                |
| mRNaseH1<br>(Clone)           | CGGCTAGCGCCACCATGCGCTGGCTGCTG    | CGGGATCCCTACTTGTTCATCGTCGTCCTTGTAAATC<br>GTCCTCAGACTGCTTCGC |
| mRNaseH1-<br>E186Q (mutation) | CCAGAGGGCCCAGATCCATGCAGCCTGCAAGG | GCTGCATGGATCTGGGCCCTCTGGTTTGTCTGT                           |

---
